# Supplementary material for: Forecasting hog prices with multisource heterogeneous data: A secondary data-decomposition based approach
Source: Research Square preprint supplement (doi:10.21203/rs.3.rs-7223401/v1), 2026-01-08
Supplement: Supplementary file 1 [file 41ef62159b58edbded687a0f.docx]

The data that support the findings of this study are available from the corresponding author upon reasonable request.
