# Supplementary material for: Forecasting hog prices with multisource heterogeneous data: A secondary data-decomposition based approach
Source: Research Square preprint supplement (doi:10.21203/rs.3.rs-7223401/v1), 2026-01-08
Supplement: Supplementary file 2 [file df73ed4c756e283a320ae1c0.docx]

INFORMED CONSENT: “This article does not contain any studies with human participants performed by any of the authors.”
